# Supplementary material for: Olfactory effects of a hypervariable multicomponent pheromone in the red-legged salamander, Plethodon shermani
Source: PLoS One. 2017 Mar 30;12(3):e0174370. doi: 10.1371/journal.pone.0174370 (PMC5373537; doi:10.1371/journal.pone.0174370)
Supplement: S1 File — (CSV) [file pone.0174370.s001.csv]

block	head	treatment	agb
4	2	EF	5
7	1	EF	7
9	5	EF	4
11	5	EF	25
12	3	EF	35
13	1	EF	14
14	2	EF	51
14	4	EF	41
1	3	EFG	20
7	2	EFG	127
7	5	EFG	13
11	1	EFG	16
11	3	EFG	34
13	4	EFG	20
4	3	EFGHI	37
7	4	EFGHI	3
8	1	EFGHI	28
11	2	EFGHI	58
11	4	EFGHI	48
12	1	EFGHI	29
3	2	G	2
3	3	G	4
4	1	G	27
8	3	G	8
9	4	G	15
12	5	G	2
13	3	G	0
14	3	G	7
1	2	GHI	20
3	5	GHI	19
7	3	GHI	71
8	2	GHI	17
8	4	GHI	81
8	5	GHI	37
12	2	GHI	17
13	2	GHI	4
13	5	GHI	35
1	1	PBS	0
1	5	PBS	4
3	1	PBS	3
3	4	PBS	20
9	1	PBS	8
1	4	WE	141
4	4	WE	67
4	5	WE	159
9	2	WE	55
9	3	WE	54
12	4	WE	49
14	1	WE	135
14	5	WE	192
